# Supplementary material
Source: PubMed Central journal article supplement (PMC4090553)
Supplement: rsbl-2014-0308-File006.pdf [file rsbl-2014-0308-File006.pdf]

| <b>ID</b> | <b>PVP</b> | <b>Category</b> | <b>Velocity</b> |
|-----------|------------|-----------------|-----------------|
| 01m02     | 0          | Bundle          | 16,62           |
| 01m02     | 0          | Bundle          | 13,50           |
| 01m02     | 0          | Single          | 13,88           |
| 01m02     | 0          | Single          | 10,88           |
| 01m02     | 0          | Single          | 7,57            |
| 01m02     | 0          | Single          | 7,59            |
| 01m02     | 0          | Single          | 10,24           |
| 02m08     | 0          | Bundle          | 23,89           |
| 02m08     | 0          | Bundle          | 19,30           |
| 02m08     | 0          | Bundle          | 16,47           |
| 02m08     | 0          | Bundle          | 24,26           |
| 02m08     | 0          | Bundle          | 13,79           |
| 02m08     | 0          | Bundle          | 13,47           |
| 02m08     | 0          | Single          | 9,55            |
| 02m08     | 0          | Single          | 8,39            |
| 02m08     | 0          | Single          | 9,13            |
| 02m08     | 0          | Single          | 9,23            |
| 02m08     | 0          | Single          | 9,68            |
| 02m08     | 0          | Single          | 6,81            |
| 02m08     | 0          | Single          | 11,73           |
| 02m08     | 0          | Single          | 6,74            |
| 02m08     | 0          | Single          | 6,76            |
| 02m08     | 0          | Single          | 6,03            |
| 02m08     | 0          | Single          | 5,69            |
| 02m08     | 0          | Single          | 7,08            |
| 02m08     | 0          | Single          | 5,16            |
| 02m08     | 0          | Single          | 7,42            |
| 02m08     | 0          | Single          | 5,36            |
| 02m08     | 0          | Single          | 9,85            |
| 02m08     | 0          | Single          | 5,62            |
| 02m08     | 0          | Single          | 7,74            |
| 02m08     | 0          | Single          | 7,82            |
| 03m08     | 0          | Bundle          | 10,68           |
| 03m08     | 0          | Bundle          | 13,20           |
| 03m08     | 0          | Single          | 5,11            |
| 03m08     | 0          | Single          | 4,01            |
| 03m08     | 0          | Single          | 5,70            |
| 03m08     | 0          | Single          | 6,65            |
| 03m08     | 0          | Single          | 10,94           |
| 03m08     | 0          | Single          | 7,27            |
| 03m08     | 0          | Single          | 4,20            |
| 04m08     | 0          | Bundle          | 19,36           |
| 04m08     | 0          | Bundle          | 9,78            |
| 04m08     | 0          | Bundle          | 11,45           |
| 04m08     | 0          | Single          | 10,19           |
| 04m08     | 0          | Single          | 8,29            |
| 04m08     | 0          | Single          | 13,23           |
| 04m08     | 0          | Single          | 9,08            |
| 04m08     | 0          | Single          | 4,68            |

|       |   |        |       |
|-------|---|--------|-------|
| 04m08 | 0 | Single | 14,81 |
| 04m08 | 0 | Single | 5,97  |
| 04m08 | 0 | Single | 10,96 |
| 05m08 | 0 | Bundle | 26,29 |
| 05m08 | 0 | Bundle | 30,62 |
| 05m08 | 0 | Bundle | 26,56 |
| 05m08 | 0 | Bundle | 40,94 |
| 05m08 | 0 | Bundle | 15,61 |
| 05m08 | 0 | Single | 21,32 |
| 05m08 | 0 | Single | 19,65 |
| 05m08 | 0 | Single | 23,69 |
| 05m08 | 0 | Single | 25,68 |
| 05m08 | 0 | Single | 22,13 |
| 05m08 | 0 | Single | 23,88 |
| 05m08 | 0 | Single | 27,05 |
| 05m08 | 0 | Single | 9,02  |
| 05m08 | 0 | Single | 23,21 |
| 05m08 | 0 | Single | 12,67 |
| 05m08 | 0 | Single | 13,00 |
| 05m08 | 0 | Single | 10,52 |
| 05m08 | 0 | Single | 13,64 |
| 05m08 | 0 | Single | 15,76 |
| 05m08 | 0 | Single | 12,98 |
| 05m08 | 0 | Single | 7,36  |
| 05m08 | 0 | Single | 7,83  |
| 05m08 | 0 | Single | 9,73  |
| 05m08 | 0 | Single | 17,14 |
| 06m09 | 0 | Bundle | 20,56 |
| 06m09 | 0 | Bundle | 12,50 |
| 06m09 | 0 | Bundle | 17,15 |
| 06m09 | 0 | Bundle | 18,13 |
| 06m09 | 0 | Bundle | 11,11 |
| 06m09 | 0 | Bundle | 17,66 |
| 06m09 | 0 | Bundle | 19,83 |
| 06m09 | 0 | Bundle | 8,69  |
| 06m09 | 0 | Bundle | 14,24 |
| 06m09 | 0 | Bundle | 6,92  |
| 06m09 | 0 | Bundle | 8,87  |
| 06m09 | 0 | Bundle | 15,52 |
| 06m09 | 0 | Bundle | 14,52 |
| 06m09 | 0 | Bundle | 16,76 |
| 06m09 | 0 | Bundle | 17,76 |
| 06m09 | 0 | Bundle | 16,95 |
| 06m09 | 0 | Bundle | 24,53 |
| 06m09 | 0 | Bundle | 24,46 |
| 06m09 | 0 | Bundle | 21,56 |
| 06m09 | 0 | Bundle | 21,73 |
| 06m09 | 0 | Bundle | 26,89 |
| 06m09 | 0 | Single | 22,98 |
| 06m09 | 0 | Single | 20,56 |

|       |   |        |       |
|-------|---|--------|-------|
| 06m09 | 0 | Single | 20,33 |
| 06m09 | 0 | Single | 21,83 |
| 06m09 | 0 | Single | 24,40 |
| 06m09 | 0 | Single | 20,50 |
| 06m09 | 0 | Single | 22,34 |
| 06m09 | 0 | Single | 26,09 |
| 06m09 | 0 | Single | 30,21 |
| 06m09 | 0 | Single | 7,22  |
| 06m09 | 0 | Single | 10,22 |
| 06m09 | 0 | Single | 15,60 |
| 06m09 | 0 | Single | 10,93 |
| 06m09 | 0 | Single | 32,26 |
| 06m09 | 0 | Single | 20,37 |
| 06m09 | 0 | Single | 12,03 |
| 06m09 | 0 | Single | 11,66 |
| 06m09 | 0 | Single | 11,47 |
| 06m09 | 0 | Single | 18,12 |
| 06m09 | 0 | Single | 15,36 |
| 06m09 | 0 | Single | 6,59  |
| 06m09 | 0 | Single | 22,31 |
| 06m09 | 0 | Single | 19,25 |
| 06m09 | 0 | Single | 15,36 |
| 06m09 | 0 | Single | 8,59  |
| 06m09 | 0 | Single | 6,71  |
| 06m09 | 0 | Single | 17,62 |
| 06m09 | 0 | Single | 8,42  |
| 06m09 | 0 | Single | 16,93 |
| 06m09 | 0 | Single | 21,57 |
| 06m09 | 0 | Single | 18,72 |
| 06m09 | 0 | Single | 9,55  |
| 06m09 | 0 | Single | 15,28 |
| 07m17 | 0 | Bundle | 26,98 |
| 07m17 | 0 | Bundle | 22,57 |
| 07m17 | 0 | Bundle | 41,08 |
| 07m17 | 0 | Bundle | 33,92 |
| 07m17 | 0 | Bundle | 24,79 |
| 07m17 | 0 | Bundle | 24,51 |
| 07m17 | 0 | Bundle | 13,54 |
| 07m17 | 0 | Bundle | 16,55 |
| 07m17 | 0 | Bundle | 23,71 |
| 07m17 | 0 | Single | 10,02 |
| 07m17 | 0 | Single | 18,70 |
| 07m17 | 0 | Single | 13,28 |
| 07m17 | 0 | Single | 14,26 |
| 07m17 | 0 | Single | 13,20 |
| 07m17 | 0 | Single | 12,48 |
| 08m17 | 0 | Bundle | 17,30 |
| 08m17 | 0 | Bundle | 12,94 |
| 08m17 | 0 | Bundle | 20,87 |
| 08m17 | 0 | Bundle | 22,07 |

|       |   |        |       |
|-------|---|--------|-------|
| 08m17 | 0 | Bundle | 23,93 |
| 08m17 | 0 | Bundle | 24,73 |
| 08m17 | 0 | Bundle | 16,62 |
| 08m17 | 0 | Single | 17,43 |
| 08m17 | 0 | Single | 18,63 |
| 08m17 | 0 | Single | 22,61 |
| 08m17 | 0 | Single | 17,99 |
| 08m17 | 0 | Single | 15,67 |
| 08m17 | 0 | Single | 15,31 |
| 08m17 | 0 | Single | 14,71 |
| 08m17 | 0 | Single | 15,85 |
| 08m17 | 0 | Single | 23,74 |
| 08m17 | 0 | Single | 19,91 |
| 08m17 | 0 | Single | 19,50 |
| 08m17 | 0 | Single | 17,89 |
| 09m17 | 0 | Bundle | 16,25 |
| 09m17 | 0 | Bundle | 20,75 |
| 09m17 | 0 | Bundle | 19,61 |
| 09m17 | 0 | Bundle | 11,85 |
| 09m17 | 0 | Bundle | 32,10 |
| 09m17 | 0 | Bundle | 41,28 |
| 09m17 | 0 | Bundle | 32,34 |
| 09m17 | 0 | Bundle | 26,26 |
| 09m17 | 0 | Bundle | 24,07 |
| 09m17 | 0 | Bundle | 27,07 |
| 09m17 | 0 | Single | 8,68  |
| 09m17 | 0 | Single | 16,00 |
| 09m17 | 0 | Single | 20,56 |
| 09m17 | 0 | Single | 27,21 |
| 09m17 | 0 | Single | 20,89 |
| 09m17 | 0 | Single | 15,87 |
| 09m17 | 0 | Single | 10,61 |
| 09m17 | 0 | Single | 13,28 |
| 10m17 | 0 | Bundle | 15,02 |
| 10m17 | 0 | Bundle | 21,06 |
| 10m17 | 0 | Bundle | 15,03 |
| 10m17 | 0 | Bundle | 24,61 |
| 10m17 | 0 | Bundle | 14,05 |
| 10m17 | 0 | Bundle | 19,63 |
| 10m17 | 0 | Bundle | 30,40 |
| 10m17 | 0 | Bundle | 12,10 |
| 10m17 | 0 | Bundle | 25,15 |
| 10m17 | 0 | Bundle | 32,91 |
| 10m17 | 0 | Bundle | 13,88 |
| 10m17 | 0 | Bundle | 11,69 |
| 10m17 | 0 | Bundle | 19,17 |
| 10m17 | 0 | Bundle | 22,91 |
| 10m17 | 0 | Bundle | 21,38 |
| 10m17 | 0 | Bundle | 15,84 |
| 10m17 | 0 | Bundle | 13,86 |

|       |   |        |       |
|-------|---|--------|-------|
| 10m17 | 0 | Bundle | 18,04 |
| 10m17 | 0 | Single | 10,31 |
| 10m17 | 0 | Single | 24,56 |
| 10m17 | 0 | Single | 25,09 |
| 10m17 | 0 | Single | 15,46 |
| 10m17 | 0 | Single | 14,41 |
| 10m17 | 0 | Single | 7,21  |
| 10m17 | 0 | Single | 7,34  |
| 10m17 | 0 | Single | 11,42 |
| 10m17 | 0 | Single | 5,91  |
| 10m17 | 0 | Single | 9,63  |
| 10m17 | 0 | Single | 7,08  |
| 10m17 | 0 | Single | 13,08 |
| 10m17 | 0 | Single | 7,83  |
| 10m17 | 0 | Single | 9,16  |
| 10m17 | 0 | Single | 8,25  |
| 10m17 | 0 | Single | 7,68  |
| 10m17 | 0 | Single | 5,94  |
| 10m17 | 0 | Single | 6,68  |
| 10m17 | 0 | Single | 16,55 |
| 11m17 | 0 | Bundle | 16,97 |
| 11m17 | 0 | Bundle | 18,83 |
| 11m17 | 0 | Bundle | 11,31 |
| 11m17 | 0 | Bundle | 18,29 |
| 11m17 | 0 | Bundle | 22,79 |
| 11m17 | 0 | Single | 12,22 |
| 11m17 | 0 | Single | 10,85 |
| 11m17 | 0 | Single | 10,50 |
| 11m17 | 0 | Single | 10,91 |
| 11m17 | 0 | Single | 11,05 |
| 11m17 | 0 | Single | 12,85 |
| 11m17 | 0 | Single | 10,33 |
| 11m17 | 0 | Single | 11,13 |
| 11m17 | 0 | Single | 8,57  |
| 11m17 | 0 | Single | 7,76  |
| 11m17 | 0 | Single | 12,10 |
| 11m17 | 0 | Single | 13,11 |
| 11m17 | 0 | Single | 18,03 |
| 11m17 | 0 | Single | 10,25 |
| 11m17 | 0 | Single | 15,92 |
| 11m17 | 0 | Single | 9,51  |
| 12m17 | 0 | Bundle | 22,88 |
| 12m17 | 0 | Bundle | 18,92 |
| 12m17 | 0 | Bundle | 22,05 |
| 12m17 | 0 | Bundle | 29,38 |
| 12m17 | 0 | Bundle | 25,50 |
| 12m17 | 0 | Bundle | 36,49 |
| 12m17 | 0 | Bundle | 28,18 |
| 12m17 | 0 | Bundle | 24,02 |
| 12m17 | 0 | Bundle | 19,58 |

|       |   |        |       |
|-------|---|--------|-------|
| 12m17 | 0 | Bundle | 26,83 |
| 12m17 | 0 | Bundle | 22,76 |
| 12m17 | 0 | Bundle | 12,65 |
| 12m17 | 0 | Bundle | 30,17 |
| 12m17 | 0 | Bundle | 19,87 |
| 12m17 | 0 | Bundle | 14,65 |
| 12m17 | 0 | Bundle | 15,38 |
| 12m17 | 0 | Bundle | 18,29 |
| 12m17 | 0 | Bundle | 23,54 |
| 12m17 | 0 | Bundle | 12,52 |
| 12m17 | 0 | Bundle | 17,76 |
| 12m17 | 0 | Bundle | 18,15 |
| 12m17 | 0 | Bundle | 20,37 |
| 12m17 | 0 | Single | 17,50 |
| 12m17 | 0 | Single | 5,31  |
| 12m17 | 0 | Single | 11,49 |
| 12m17 | 0 | Single | 18,72 |
| 12m17 | 0 | Single | 39,41 |
| 12m17 | 0 | Single | 15,74 |
| 12m17 | 0 | Single | 21,02 |
| 12m17 | 0 | Single | 14,68 |
| 12m17 | 0 | Single | 11,15 |
| 12m17 | 0 | Single | 21,12 |
| 13m21 | 0 | Bundle | 11,96 |
| 13m21 | 0 | Bundle | 7,94  |
| 13m21 | 0 | Bundle | 2,53  |
| 13m21 | 0 | Bundle | 6,38  |
| 13m21 | 0 | Bundle | 14,02 |
| 13m21 | 0 | Bundle | 11,05 |
| 13m21 | 0 | Single | 15,05 |
| 13m21 | 0 | Single | 13,55 |
| 13m21 | 0 | Single | 15,42 |
| 13m21 | 0 | Single | 11,55 |
| 13m21 | 0 | Single | 19,74 |
| 14m21 | 0 | Bundle | 7,96  |
| 14m21 | 0 | Bundle | 19,97 |
| 14m21 | 0 | Single | 12,24 |
| 14m21 | 0 | Single | 16,00 |
| 14m21 | 0 | Single | 24,33 |
| 14m21 | 0 | Single | 26,21 |
| 14m21 | 0 | Single | 19,94 |
| 15m21 | 0 | Bundle | 24,21 |
| 15m21 | 0 | Bundle | 16,93 |
| 15m21 | 0 | Bundle | 27,12 |
| 15m21 | 0 | Bundle | 27,56 |
| 15m21 | 0 | Bundle | 22,28 |
| 15m21 | 0 | Single | 15,48 |
| 15m21 | 0 | Single | 11,68 |
| 15m21 | 0 | Single | 7,28  |
| 15m21 | 0 | Single | 19,65 |

|       |     |        |       |
|-------|-----|--------|-------|
| 15m21 | 0   | Single | 12,10 |
| 16m21 | 0   | Bundle | 15,03 |
| 16m21 | 0   | Bundle | 8,21  |
| 16m21 | 0   | Bundle | 13,26 |
| 16m21 | 0   | Bundle | 22,49 |
| 16m21 | 0   | Single | 19,86 |
| 16m21 | 0   | Single | 20,03 |
| 16m21 | 0   | Single | 20,76 |
| 16m21 | 0   | Single | 22,87 |
| 16m21 | 0   | Single | 22,90 |
| 16m21 | 0   | Single | 9,18  |
| 17m21 | 0   | Bundle | 30,59 |
| 17m21 | 0   | Bundle | 29,80 |
| 17m21 | 0   | Bundle | 18,14 |
| 17m21 | 0   | Bundle | 13,12 |
| 17m21 | 0   | Bundle | 15,03 |
| 17m21 | 0   | Bundle | 28,85 |
| 17m21 | 0   | Bundle | 35,05 |
| 17m21 | 0   | Bundle | 30,74 |
| 17m21 | 0   | Bundle | 25,22 |
| 17m21 | 0   | Bundle | 17,19 |
| 17m21 | 0   | Single | 20,13 |
| 17m21 | 0   | Single | 9,10  |
| 17m21 | 0   | Single | 19,04 |
| 17m21 | 0   | Single | 18,46 |
| 17m21 | 0   | Single | 11,97 |
| 18m08 | 0,5 | Bundle | 22,20 |
| 18m08 | 0,5 | Bundle | 23,95 |
| 18m08 | 0,5 | Bundle | 25,47 |
| 18m08 | 0,5 | Bundle | 17,33 |
| 18m08 | 0,5 | Bundle | 23,97 |
| 18m08 | 0,5 | Single | 14,95 |
| 18m08 | 0,5 | Single | 17,51 |
| 18m08 | 0,5 | Single | 17,03 |
| 18m08 | 0,5 | Single | 20,88 |
| 18m08 | 0,5 | Single | 25,47 |
| 18m08 | 0,5 | Single | 16,13 |
| 18m08 | 0,5 | Single | 15,97 |
| 18m08 | 0,5 | Single | 18,35 |
| 19m17 | 0,5 | Bundle | 29,32 |
| 19m17 | 0,5 | Bundle | 29,51 |
| 19m17 | 0,5 | Bundle | 31,88 |
| 19m17 | 0,5 | Bundle | 26,11 |
| 19m17 | 0,5 | Bundle | 20,70 |
| 19m17 | 0,5 | Bundle | 18,89 |
| 19m17 | 0,5 | Bundle | 24,44 |
| 19m17 | 0,5 | Bundle | 22,82 |
| 19m17 | 0,5 | Bundle | 14,81 |
| 19m17 | 0,5 | Bundle | 28,16 |
| 19m17 | 0,5 | Bundle | 15,42 |

|       |     |        |       |
|-------|-----|--------|-------|
| 19m17 | 0,5 | Bundle | 18,11 |
| 19m17 | 0,5 | Bundle | 6,20  |
| 19m17 | 0,5 | Bundle | 12,49 |
| 19m17 | 0,5 | Single | 18,42 |
| 19m17 | 0,5 | Single | 18,86 |
| 19m17 | 0,5 | Single | 13,31 |
| 19m17 | 0,5 | Single | 18,24 |
| 19m17 | 0,5 | Single | 28,39 |
| 19m17 | 0,5 | Single | 26,43 |
| 19m17 | 0,5 | Single | 11,85 |
| 19m17 | 0,5 | Single | 14,18 |
| 19m17 | 0,5 | Single | 16,40 |
| 20m17 | 0,5 | Bundle | 26,12 |
| 20m17 | 0,5 | Bundle | 29,01 |
| 20m17 | 0,5 | Bundle | 30,59 |
| 20m17 | 0,5 | Bundle | 23,34 |
| 20m17 | 0,5 | Bundle | 25,59 |
| 20m17 | 0,5 | Single | 22,91 |
| 20m17 | 0,5 | Single | 30,02 |
| 20m17 | 0,5 | Single | 37,13 |
| 20m17 | 0,5 | Single | 32,39 |
| 20m17 | 0,5 | Single | 35,80 |
| 20m17 | 0,5 | Single | 31,42 |
| 20m17 | 0,5 | Single | 31,97 |
| 20m17 | 0,5 | Single | 33,38 |
| 21m17 | 0,5 | Bundle | 13,96 |
| 21m17 | 0,5 | Bundle | 16,80 |
| 21m17 | 0,5 | Bundle | 25,61 |
| 21m17 | 0,5 | Bundle | 19,62 |
| 21m17 | 0,5 | Bundle | 19,43 |
| 21m17 | 0,5 | Bundle | 17,72 |
| 21m17 | 0,5 | Bundle | 15,91 |
| 21m17 | 0,5 | Bundle | 19,74 |
| 21m17 | 0,5 | Single | 15,52 |
| 21m17 | 0,5 | Single | 15,53 |
| 21m17 | 0,5 | Single | 12,21 |
| 21m17 | 0,5 | Single | 16,71 |
| 21m17 | 0,5 | Single | 9,77  |
| 21m17 | 0,5 | Single | 15,37 |
| 21m17 | 0,5 | Single | 19,98 |
| 21m17 | 0,5 | Single | 24,10 |
| 21m17 | 0,5 | Single | 12,85 |
| 21m17 | 0,5 | Single | 16,95 |
| 22m17 | 0,5 | Bundle | 12,41 |
| 22m17 | 0,5 | Bundle | 19,79 |
| 22m17 | 0,5 | Single | 20,02 |
| 22m17 | 0,5 | Single | 10,93 |
| 22m17 | 0,5 | Single | 25,94 |
| 22m17 | 0,5 | Single | 17,52 |
| 22m17 | 0,5 | Single | 17,43 |



|       |     |        |       |
|-------|-----|--------|-------|
| 23m21 | 0,5 | Bundle | 10,77 |
| 23m21 | 0,5 | Bundle | 46,01 |
| 23m21 | 0,5 | Bundle | 25,27 |
| 23m21 | 0,5 | Bundle | 16,30 |
| 23m21 | 0,5 | Bundle | 21,67 |
| 23m21 | 0,5 | Bundle | 23,60 |
| 23m21 | 0,5 | Bundle | 27,29 |
| 23m21 | 0,5 | Single | 9,46  |
| 23m21 | 0,5 | Single | 14,82 |
| 23m21 | 0,5 | Single | 17,88 |
| 23m21 | 0,5 | Single | 12,04 |
| 23m21 | 0,5 | Single | 42,34 |
| 23m21 | 0,5 | Single | 8,22  |
| 24m08 | 1,5 | Bundle | 19,28 |
| 24m08 | 1,5 | Bundle | 26,98 |
| 24m08 | 1,5 | Bundle | 28,70 |
| 24m08 | 1,5 | Bundle | 23,89 |
| 24m08 | 1,5 | Bundle | 22,23 |
| 24m08 | 1,5 | Bundle | 20,67 |
| 24m08 | 1,5 | Single | 8,60  |
| 24m08 | 1,5 | Single | 3,56  |
| 24m08 | 1,5 | Single | 8,25  |
| 24m08 | 1,5 | Single | 10,46 |
| 24m08 | 1,5 | Single | 6,47  |
| 26m17 | 1,5 | Bundle | 20,32 |
| 26m17 | 1,5 | Bundle | 16,42 |
| 26m17 | 1,5 | Bundle | 15,68 |
| 26m17 | 1,5 | Bundle | 17,76 |
| 26m17 | 1,5 | Bundle | 13,03 |
| 26m17 | 1,5 | Bundle | 17,24 |
| 26m17 | 1,5 | Bundle | 19,52 |
| 26m17 | 1,5 | Bundle | 17,51 |
| 26m17 | 1,5 | Bundle | 21,88 |
| 26m17 | 1,5 | Bundle | 19,48 |
| 26m17 | 1,5 | Bundle | 13,09 |
| 26m17 | 1,5 | Bundle | 21,33 |
| 26m17 | 1,5 | Bundle | 15,13 |
| 26m17 | 1,5 | Bundle | 11,73 |
| 26m17 | 1,5 | Bundle | 17,79 |
| 26m17 | 1,5 | Bundle | 14,58 |
| 26m17 | 1,5 | Bundle | 15,74 |
| 26m17 | 1,5 | Bundle | 14,29 |
| 26m17 | 1,5 | Bundle | 15,47 |
| 26m17 | 1,5 | Single | 19,71 |
| 26m17 | 1,5 | Single | 24,69 |
| 26m17 | 1,5 | Single | 15,42 |
| 26m17 | 1,5 | Single | 16,23 |
| 26m17 | 1,5 | Single | 21,34 |
| 26m17 | 1,5 | Single | 16,20 |
| 27m17 | 1,5 | Bundle | 17,53 |

|       |     |        |       |
|-------|-----|--------|-------|
| 27m17 | 1,5 | Bundle | 25,34 |
| 27m17 | 1,5 | Bundle | 13,54 |
| 27m17 | 1,5 | Bundle | 12,78 |
| 27m17 | 1,5 | Bundle | 14,27 |
| 27m17 | 1,5 | Bundle | 14,96 |
| 27m17 | 1,5 | Bundle | 9,02  |
| 27m17 | 1,5 | Bundle | 10,85 |
| 27m17 | 1,5 | Bundle | 7,83  |
| 27m17 | 1,5 | Bundle | 12,38 |
| 27m17 | 1,5 | Bundle | 11,04 |
| 27m17 | 1,5 | Bundle | 12,59 |
| 27m17 | 1,5 | Bundle | 9,41  |
| 27m17 | 1,5 | Bundle | 19,32 |
| 27m17 | 1,5 | Bundle | 11,84 |
| 27m17 | 1,5 | Bundle | 10,67 |
| 27m17 | 1,5 | Bundle | 9,96  |
| 27m17 | 1,5 | Bundle | 13,66 |
| 27m17 | 1,5 | Bundle | 14,95 |
| 27m17 | 1,5 | Bundle | 14,87 |
| 27m17 | 1,5 | Single | 19,05 |
| 27m17 | 1,5 | Single | 9,62  |
| 27m17 | 1,5 | Single | 12,87 |
| 27m17 | 1,5 | Single | 6,96  |
| 27m17 | 1,5 | Single | 14,63 |
| 27m17 | 1,5 | Single | 6,01  |
| 27m17 | 1,5 | Single | 9,40  |
| 27m17 | 1,5 | Single | 12,09 |
| 27m17 | 1,5 | Single | 11,01 |
| 27m17 | 1,5 | Single | 7,14  |
| 27m17 | 1,5 | Single | 15,09 |
| 27m17 | 1,5 | Single | 12,80 |
| 27m17 | 1,5 | Single | 8,46  |
| 27m17 | 1,5 | Single | 14,95 |
| 27m17 | 1,5 | Single | 13,13 |
| 27m17 | 1,5 | Single | 14,20 |
| 27m17 | 1,5 | Single | 6,33  |
| 27m17 | 1,5 | Single | 12,76 |
| 27m17 | 1,5 | Single | 6,98  |
| 27m17 | 1,5 | Single | 12,28 |
| 27m17 | 1,5 | Single | 8,95  |
| 27m17 | 1,5 | Single | 11,53 |
| 27m17 | 1,5 | Single | 12,70 |
| 27m17 | 1,5 | Single | 12,59 |
| 28m21 | 1,5 | Bundle | 16,49 |
| 28m21 | 1,5 | Bundle | 23,62 |
| 28m21 | 1,5 | Bundle | 18,17 |
| 28m21 | 1,5 | Bundle | 27,45 |
| 28m21 | 1,5 | Bundle | 19,74 |
| 28m21 | 1,5 | Bundle | 17,94 |
| 28m21 | 1,5 | Single | 15,29 |

|       |     |        |       |
|-------|-----|--------|-------|
| 28m21 | 1,5 | Single | 7,27  |
| 28m21 | 1,5 | Single | 14,66 |
| 28m21 | 1,5 | Single | 13,72 |
| 28m21 | 1,5 | Single | 19,14 |
| 28m21 | 1,5 | Single | 18,81 |
| 28m21 | 1,5 | Single | 16,06 |
| 28m21 | 1,5 | Single | 20,82 |
| 29m21 | 1,5 | Bundle | 14,64 |
| 29m21 | 1,5 | Bundle | 20,17 |
| 29m21 | 1,5 | Bundle | 20,66 |
| 29m21 | 1,5 | Bundle | 18,94 |
| 29m21 | 1,5 | Single | 16,07 |
| 29m21 | 1,5 | Single | 12,47 |
| 29m21 | 1,5 | Single | 15,47 |
| 29m21 | 1,5 | Single | 20,84 |
| 29m21 | 1,5 | Single | 21,51 |
| 29m21 | 1,5 | Single | 12,16 |
| 29m21 | 1,5 | Single | 18,07 |
| 29m21 | 1,5 | Single | 10,90 |
| 29m21 | 1,5 | Single | 18,53 |
| 29m21 | 1,5 | Single | 18,57 |
| 29m21 | 1,5 | Single | 10,80 |
| 29m21 | 1,5 | Single | 16,17 |
| 29m21 | 1,5 | Single | 15,30 |
| 29m21 | 1,5 | Single | 7,87  |
| 29m21 | 1,5 | Single | 18,13 |
| 29m21 | 1,5 | Single | 10,63 |
| 29m21 | 1,5 | Single | 10,86 |
| 29m21 | 1,5 | Single | 15,57 |
| 29m21 | 1,5 | Single | 21,11 |
| 29m21 | 1,5 | Single | 21,61 |
| 29m21 | 1,5 | Single | 8,73  |
| 30m21 | 1,5 | Bundle | 20,60 |
| 30m21 | 1,5 | Bundle | 26,55 |
| 30m21 | 1,5 | Bundle | 26,08 |
| 30m21 | 1,5 | Bundle | 20,83 |
| 30m21 | 1,5 | Bundle | 21,09 |
| 30m21 | 1,5 | Bundle | 27,89 |
| 30m21 | 1,5 | Bundle | 20,62 |
| 30m21 | 1,5 | Bundle | 22,38 |
| 30m21 | 1,5 | Bundle | 29,78 |
| 30m21 | 1,5 | Bundle | 22,31 |
| 30m21 | 1,5 | Bundle | 33,26 |
| 30m21 | 1,5 | Bundle | 25,53 |
| 30m21 | 1,5 | Single | 17,40 |
| 30m21 | 1,5 | Single | 17,94 |
| 30m21 | 1,5 | Single | 18,08 |
| 30m21 | 1,5 | Single | 14,90 |
| 30m21 | 1,5 | Single | 23,06 |
| 30m21 | 1,5 | Single | 22,87 |

|       |     |        |       |
|-------|-----|--------|-------|
| 30m21 | 1,5 | Single | 20,70 |
| 30m21 | 1,5 | Single | 19,60 |
| 30m21 | 1,5 | Single | 21,25 |
| 30m21 | 1,5 | Single | 26,11 |
| 30m21 | 1,5 | Single | 12,98 |
| 30m21 | 1,5 | Single | 26,10 |
| 30m21 | 1,5 | Single | 23,63 |
| 30m21 | 1,5 | Single | 21,85 |
| 30m21 | 1,5 | Single | 23,81 |
| 30m21 | 1,5 | Single | 19,09 |
| 31m02 | 4   | Bundle | 16,74 |
| 31m02 | 4   | Bundle | 21,43 |
| 31m02 | 4   | Single | 3,99  |
| 31m02 | 4   | Single | 11,13 |
| 31m02 | 4   | Single | 9,54  |
| 31m02 | 4   | Single | 9,30  |
| 31m02 | 4   | Single | 5,69  |
| 31m02 | 4   | Single | 10,80 |
| 32m08 | 4   | Bundle | 16,86 |
| 32m08 | 4   | Single | 4,80  |
| 32m08 | 4   | Single | 4,04  |
| 32m08 | 4   | Single | 8,11  |
| 32m08 | 4   | Single | 7,44  |
| 32m08 | 4   | Single | 6,90  |
| 32m08 | 4   | Single | 9,79  |
| 32m08 | 4   | Single | 6,36  |
| 32m08 | 4   | Single | 8,03  |
| 33m17 | 4   | Bundle | 19,64 |
| 33m17 | 4   | Bundle | 20,43 |
| 33m17 | 4   | Bundle | 27,59 |
| 33m17 | 4   | Bundle | 40,60 |
| 33m17 | 4   | Bundle | 20,26 |
| 33m17 | 4   | Single | 10,39 |
| 33m17 | 4   | Single | 7,05  |
| 33m17 | 4   | Single | 6,16  |
| 33m17 | 4   | Single | 8,82  |
| 33m17 | 4   | Single | 6,52  |
| 33m17 | 4   | Single | 11,55 |
| 33m17 | 4   | Single | 8,39  |
| 34m21 | 4   | Bundle | 19,07 |
| 34m21 | 4   | Bundle | 22,26 |
| 34m21 | 4   | Bundle | 18,32 |
| 34m21 | 4   | Bundle | 14,26 |
| 34m21 | 4   | Bundle | 32,65 |
| 34m21 | 4   | Bundle | 18,85 |
| 34m21 | 4   | Bundle | 18,06 |
| 34m21 | 4   | Bundle | 12,74 |
| 34m21 | 4   | Bundle | 24,87 |
| 34m21 | 4   | Bundle | 17,76 |
| 34m21 | 4   | Bundle | 17,87 |

|       |   |        |       |
|-------|---|--------|-------|
| 34m21 | 4 | Bundle | 18,09 |
| 34m21 | 4 | Bundle | 19,42 |
| 34m21 | 4 | Bundle | 23,45 |
| 34m21 | 4 | Bundle | 16,78 |
| 34m21 | 4 | Single | 7,83  |
| 34m21 | 4 | Single | 11,74 |
| 34m21 | 4 | Single | 13,40 |
| 34m21 | 4 | Single | 8,50  |
| 34m21 | 4 | Single | 14,41 |
| 34m21 | 4 | Single | 15,68 |
| 35m21 | 4 | Bundle | 15,91 |
| 35m21 | 4 | Bundle | 18,20 |
| 35m21 | 4 | Bundle | 19,10 |
| 35m21 | 4 | Bundle | 14,67 |
| 35m21 | 4 | Bundle | 11,69 |
| 35m21 | 4 | Bundle | 19,95 |
| 35m21 | 4 | Bundle | 29,71 |
| 35m21 | 4 | Bundle | 16,32 |
| 35m21 | 4 | Bundle | 19,97 |
| 35m21 | 4 | Bundle | 33,00 |
| 35m21 | 4 | Bundle | 27,69 |
| 35m21 | 4 | Bundle | 22,55 |
| 35m21 | 4 | Bundle | 21,96 |
| 35m21 | 4 | Bundle | 31,91 |
| 35m21 | 4 | Bundle | 20,56 |
| 35m21 | 4 | Bundle | 26,47 |
| 35m21 | 4 | Bundle | 29,43 |
| 35m21 | 4 | Single | 5,76  |
| 35m21 | 4 | Single | 5,75  |
| 35m21 | 4 | Single | 9,84  |
| 35m21 | 4 | Single | 6,97  |
| 35m21 | 4 | Single | 9,14  |
| 35m21 | 4 | Single | 7,72  |
| 35m21 | 4 | Single | 9,69  |
| 35m21 | 4 | Single | 6,48  |
| 35m21 | 4 | Single | 12,51 |
| 35m21 | 4 | Single | 7,89  |
| 35m21 | 4 | Single | 6,67  |
| 35m21 | 4 | Single | 8,19  |
| 35m21 | 4 | Single | 8,45  |
| 35m21 | 4 | Single | 8,04  |
| 35m21 | 4 | Single | 9,46  |
| 35m21 | 4 | Single | 12,55 |
| 35m21 | 4 | Single | 9,79  |
| 35m21 | 4 | Single | 7,56  |
| 35m21 | 4 | Single | 14,20 |
| 35m21 | 4 | Single | 8,39  |
| 35m21 | 4 | Single | 12,58 |
| 35m21 | 4 | Single | 14,71 |
| 35m21 | 4 | Single | 12,39 |

|       |   |        |       |
|-------|---|--------|-------|
| 35m21 | 4 | Single | 10,64 |
| 35m21 | 4 | Single | 10,89 |
| 35m21 | 4 | Single | 9,87  |
| 35m21 | 4 | Single | 12,28 |
| 35m21 | 4 | Single | 6,81  |
| 35m21 | 4 | Single | 12,90 |
| 35m21 | 4 | Single | 7,21  |
| 35m21 | 4 | Single | 11,86 |
| 35m21 | 4 | Single | 9,18  |
